# Supplementary material
Source: publisher site journal article supplement (https://www.spandidos-publications.com/5511/downloadSupplementary)
Supplement: Supplementary file 1 [file downloadSupplementary]

## Sheet: Sheet1
Table SIV. Genes positively correlated with GNPNAT1 in the GEPIA2 database.
Gene symbol	Gene ID	PCC
PSMC6	ENSG00000100519.11	0.78
STYX	ENSG00000198252.11	0.75
L2HGDH	ENSG00000087299.11	0.71
DDHD1	ENSG00000100523.14	0.68
SOS2	ENSG00000100485.11	0.62
ARF6	ENSG00000165527.6	0.62
GMFB	ENSG00000197045.12	0.59
NAA30	ENSG00000139977.13	0.59
TXNDC16	ENSG00000087301.8	0.59
NEMF	ENSG00000165525.17	0.58
C14orf166	ENSG00000087302.8	0.57
TM9SF3	ENSG00000077147.14	0.56
RALGAPA1P	ENSG00000229419.1	0.56
IDE	ENSG00000119912.15	0.56
TMX1	ENSG00000139921.12	0.56
CNIH1	ENSG00000100528.11	0.55
SCYL2	ENSG00000136021.17	0.54
SOCS4	ENSG00000180008.8	0.54
DNAAF2	ENSG00000165506.14	0.54
PPP2R5E	ENSG00000154001.13	0.54
DAAM1	ENSG00000100592.15	0.53
EIF4E	ENSG00000151247.12	0.53
AP5M1	ENSG00000053770.11	0.53
EXOC5	ENSG00000070367.15	0.53
USP38	ENSG00000170185.9	0.53
TMEM184C	ENSG00000164168.7	0.52
TNPO1	ENSG00000083312.17	0.52
SEC24A	ENSG00000113615.12	0.52
PRRC1	ENSG00000164244.20	0.52
GPR137C	ENSG00000180998.11	0.52
G3BP2	ENSG00000138757.14	0.52
TMEM87B	ENSG00000153214.9	0.52
FAM35A	ENSG00000122376.11	0.52
JKAMP	ENSG00000050130.17	0.51
G2E3	ENSG00000092140.14	0.51
GTF2A1	ENSG00000165417.11	0.51
DENR	ENSG00000139726.10	0.51
PTGES3	ENSG00000110958.15	0.51
LARP4	ENSG00000161813.20	0.51
DTWD2	ENSG00000169570.9	0.51
SLC30A9	ENSG00000014824.13	0.51
RP11-474G23.2	ENSG00000273275.1	0.51
KLHL8	ENSG00000145332.13	0.5
TMTC3	ENSG00000139324.11	0.5
GTF2H3	ENSG00000111358.13	0.5
RBM27	ENSG00000091009.7	0.5
PDS5A	ENSG00000121892.14	0.5
WDR36	ENSG00000134987.11	0.5
CS	ENSG00000062485.18	0.5
DHX15	ENSG00000109606.12	0.5
SMARCAD1	ENSG00000163104.17	0.5
WDR89	ENSG00000140006.11	0.5
TRMT5	ENSG00000126814.6	0.5
PUS7L	ENSG00000129317.14	0.5
TMEM33	ENSG00000109133.12	0.49
UHRF1BP1L	ENSG00000111647.12	0.49
ATP2A2	ENSG00000174437.16	0.49
RAD23B	ENSG00000119318.12	0.49
TMED2	ENSG00000086598.10	0.49
CNOT6	ENSG00000113300.11	0.49
PAPOLA	ENSG00000090060.17	0.49
NAA15	ENSG00000164134.12	0.49
RALGAPA1	ENSG00000174373.15	0.49
GSKIP	ENSG00000100744.14	0.49
2022-03-05	ENSG00000198060.9	0.49
FCF1	ENSG00000119616.11	0.49
NAA25	ENSG00000111300.9	0.49
TMEM192	ENSG00000170088.13	0.49
ECT2	ENSG00000114346.13	0.49
IBTK	ENSG00000005700.14	0.49
ZBTB6	ENSG00000186130.4	0.49
SCAMP1	ENSG00000085365.17	0.49
IPO7	ENSG00000205339.9	0.49
TOMM70A	ENSG00000154174.7	0.49
TOP1	ENSG00000198900.5	0.49
GFM1	ENSG00000168827.14	0.49
CERS6	ENSG00000172292.14	0.49
C9orf91	ENSG00000157693.14	0.48
CPSF2	ENSG00000165934.12	0.48
AGGF1	ENSG00000164252.12	0.48
SLC35A5	ENSG00000138459.8	0.48
KIAA0391	ENSG00000100890.15	0.48
COPB1	ENSG00000129083.12	0.48
IARS	ENSG00000196305.17	0.48
SMAD5	ENSG00000113658.16	0.48
API5	ENSG00000166181.12	0.48
SLC10A7	ENSG00000120519.14	0.48
TDG	ENSG00000139372.14	0.48
ZMPSTE24	ENSG00000084073.8	0.48
ELMOD2	ENSG00000179387.9	0.48
C4orf29	ENSG00000164074.14	0.48
STRN3	ENSG00000196792.11	0.48
SRSF1	ENSG00000136450.12	0.48
REST	ENSG00000084093.15	0.48
RPAP3	ENSG00000005175.9	0.48
SNX6	ENSG00000129515.18	0.48
VEZT	ENSG00000028203.17	0.48
CCNT1	ENSG00000129315.9	0.48
NMD3	ENSG00000169251.12	0.48
CHUK	ENSG00000213341.10	0.47
PTPN11	ENSG00000179295.15	0.47
BRI3BP	ENSG00000184992.10	0.47
EIF3J	ENSG00000104131.12	0.47
CSNK1A1	ENSG00000113712.16	0.47
TNKS2	ENSG00000107854.5	0.47
SLC25A46	ENSG00000164209.16	0.47
SLC39A9	ENSG00000029364.11	0.47
MATR3	ENSG00000015479.17	0.47
SPATS2	ENSG00000123352.17	0.47
DIP2B	ENSG00000066084.12	0.47
PLEKHF2	ENSG00000175895.3	0.47
PRDM4	ENSG00000110851.11	0.47
ZBTB11	ENSG00000066422.4	0.47
PSMD5	ENSG00000095261.13	0.47
RAB14	ENSG00000119396.10	0.47
CNOT11	ENSG00000158435.7	0.47
GMCL1	ENSG00000087338.4	0.47
EFR3A	ENSG00000132294.13	0.47
SPTY2D1	ENSG00000179119.14	0.47
CTD-2196E14.7	ENSG00000279618.1	0.47
UBR1	ENSG00000159459.11	0.47
ZNF322	ENSG00000181315.10	0.47
UEVLD	ENSG00000151116.16	0.47
CLOCK	ENSG00000134852.14	0.47
POLR3B	ENSG00000013503.9	0.47
CLINT1	ENSG00000113282.13	0.47
GRHL2	ENSG00000083307.10	0.47
GSPT1	ENSG00000103342.12	0.47
PPP1CC	ENSG00000186298.11	0.47
UTP15	ENSG00000164338.9	0.47
RBM12	ENSG00000244462.7	0.47
SEC24B	ENSG00000138802.11	0.47
CFAP97	ENSG00000164323.12	0.47
COPB2	ENSG00000184432.9	0.47
EIF5	ENSG00000100664.10	0.47
TRAPPC6B	ENSG00000182400.14	0.47
DKFZp434P228	ENSG00000279232.1	0.46
EIF4G2	ENSG00000110321.15	0.46
LYSMD3	ENSG00000176018.12	0.46
MRPL30	ENSG00000185414.19	0.46
SRFBP1	ENSG00000151304.5	0.46
SLAIN2	ENSG00000109171.14	0.46
SLC33A1	ENSG00000169359.13	0.46
ETF1	ENSG00000120705.12	0.46
ZFP91	ENSG00000186660.14	0.46
C9orf41	ENSG00000156017.12	0.46
ARFIP1	ENSG00000164144.14	0.46
ITCH	ENSG00000078747.12	0.46
MBTPS2	ENSG00000012174.11	0.46
IREB2	ENSG00000136381.12	0.46
EIF2AK3	ENSG00000172071.11	0.46
ADNP	ENSG00000101126.15	0.46
USO1	ENSG00000138768.14	0.46
APOOL	ENSG00000155008.13	0.46
KIAA1715	ENSG00000144320.13	0.46
FKTN	ENSG00000106692.13	0.46
TMEM167A	ENSG00000174695.9	0.46
USP7	ENSG00000187555.14	0.46
TMED7	ENSG00000134970.13	0.46
VPS33A	ENSG00000139719.9	0.46
TMEM131	ENSG00000075568.16	0.46
UBR7	ENSG00000012963.13	0.46
CPSF6	ENSG00000111605.16	0.46
C16orf72	ENSG00000182831.11	0.46
GXYLT1	ENSG00000151233.10	0.46
PGGT1B	ENSG00000164219.9	0.46
CDC23	ENSG00000094880.10	0.46
ATP5S	ENSG00000125375.14	0.46
HMGXB4	ENSG00000100281.13	0.46
GTF3C4	ENSG00000125484.11	0.46
FAF2	ENSG00000113194.12	0.46
KIF3B	ENSG00000101350.7	0.46
PHAX	ENSG00000164902.13	0.46
PDPK1	ENSG00000140992.18	0.46
MARVELD2	ENSG00000152939.14	0.46
YIPF6	ENSG00000181704.11	0.46
FAM91A1	ENSG00000176853.15	0.46
TTC37	ENSG00000198677.10	0.46
MAPK1IP1L	ENSG00000168175.14	0.46
PUM2	ENSG00000055917.15	0.46
SLC30A5	ENSG00000145740.18	0.46
SDAD1	ENSG00000198301.11	0.46
FAM199X	ENSG00000123575.8	0.46
SYNJ2BP	ENSG00000213463.4	0.45
MSH3	ENSG00000113318.9	0.45
PPP1R15B	ENSG00000158615.8	0.45
KIAA0586	ENSG00000100578.14	0.45
UBXN4	ENSG00000144224.16	0.45
XPO1	ENSG00000082898.16	0.45
KIAA1958	ENSG00000165185.14	0.45
TMOD3	ENSG00000138594.12	0.45
NADK2	ENSG00000152620.12	0.45
OCRL	ENSG00000122126.15	0.45
LIN54	ENSG00000189308.10	0.45
DLG3	ENSG00000082458.11	0.45
ABCE1	ENSG00000164163.10	0.45
USP9X	ENSG00000124486.12	0.45
STT3B	ENSG00000163527.9	0.45
POC1B	ENSG00000139323.13	0.45
TWF1	ENSG00000151239.13	0.45
TXNDC9	ENSG00000115514.11	0.45
C5orf51	ENSG00000205765.8	0.45
CH17-118O6.3	ENSG00000275585.1	0.45
RANBP9	ENSG00000010017.12	0.45
LCOR	ENSG00000196233.11	0.45
RAB3D	ENSG00000105514.7	0.45
PRDM10	ENSG00000170325.14	0.45
C2orf69	ENSG00000178074.5	0.45
SLC35F5	ENSG00000115084.12	0.45
DPY19L4	ENSG00000156162.16	0.45
QTRTD1	ENSG00000151576.10	0.45
ZNF770	ENSG00000198146.4	0.45
AREL1	ENSG00000119682.16	0.45
NUBPL	ENSG00000151413.16	0.45
SETD7	ENSG00000145391.13	0.45
ACTR2	ENSG00000138071.13	0.45
TRIP11	ENSG00000100815.12	0.45
UHRF1BP1	ENSG00000065060.16	0.45
INIP	ENSG00000148153.13	0.45
MRPL42	ENSG00000198015.12	0.45
RP4-785G19.2	ENSG00000236456.1	0.45
CAPZA2	ENSG00000198898.12	0.45
METTL15P1	ENSG00000174912.7	0.45
HN1L	ENSG00000206053.12	0.45
KPNB1	ENSG00000108424.9	0.45
NBN	ENSG00000104320.13	0.45
YTHDF3	ENSG00000185728.16	0.45
AFF4	ENSG00000072364.12	0.45
SP1	ENSG00000185591.9	0.45
ZNF468	ENSG00000204604.9	0.45
UBA6	ENSG00000033178.12	0.45
C5orf24	ENSG00000181904.8	0.45
MPP5	ENSG00000072415.8	0.44
PANK3	ENSG00000120137.6	0.44
ASAH2B	ENSG00000204147.9	0.44
AASDHPPT	ENSG00000149313.10	0.44
RARS	ENSG00000113643.8	0.44
EPT1	ENSG00000138018.17	0.44
PPM1A	ENSG00000100614.17	0.44
SRP72	ENSG00000174780.15	0.44
PURB	ENSG00000146676.6	0.44
ICK	ENSG00000112144.15	0.44
SUDS3P1	ENSG00000249129.1	0.44
VCPKMT	ENSG00000100483.13	0.44
SCAF11	ENSG00000139218.17	0.44
CTAGE5	ENSG00000150527.16	0.44
CTDSPL2	ENSG00000137770.13	0.44
LARP1B	ENSG00000138709.17	0.44
GPR107	ENSG00000148358.19	0.44
DARS2	ENSG00000117593.9	0.44
SEC24D	ENSG00000150961.14	0.44
APC	ENSG00000134982.16	0.44
PPP2CA	ENSG00000113575.9	0.44
SLC30A6	ENSG00000152683.14	0.44
TMEM260	ENSG00000070269.13	0.44
PRKAG1	ENSG00000181929.11	0.44
SLC30A7	ENSG00000162695.11	0.44
DBT	ENSG00000137992.14	0.44
TMEM263	ENSG00000151135.9	0.44
PREPL	ENSG00000138078.15	0.44
RP11-342K6.2	ENSG00000271452.1	0.44
RP11-649E7.5	ENSG00000258377.1	0.44
RBM12B	ENSG00000183808.11	0.44
SUDS3	ENSG00000111707.11	0.44
OPA1	ENSG00000198836.8	0.44
AVL9	ENSG00000105778.17	0.44
LRRC58	ENSG00000163428.3	0.44
DTD2	ENSG00000129480.12	0.44
RBAK	ENSG00000146587.17	0.44
UBQLN1	ENSG00000135018.13	0.44
C12orf29	ENSG00000133641.17	0.44
SLC35A3	ENSG00000117620.12	0.44
NLN	ENSG00000123213.22	0.44
RP11-342K6.1	ENSG00000270696.1	0.44
THAP5	ENSG00000177683.13	0.44
PDXDC1	ENSG00000179889.18	0.44
SEL1L	ENSG00000071537.13	0.44
METAP2	ENSG00000111142.13	0.44
YY1	ENSG00000100811.10	0.44
TRIQK	ENSG00000205133.11	0.44
PRKCI	ENSG00000163558.12	0.44
NEDD1	ENSG00000139350.11	0.44
ARID2	ENSG00000189079.15	0.44
ERBB2IP	ENSG00000112851.14	0.44
GAPVD1	ENSG00000165219.21	0.44
PIK3C2A	ENSG00000011405.13	0.44
PPIP5K2	ENSG00000145725.19	0.44
FBXW2	ENSG00000119402.16	0.44
2022-03-07	ENSG00000136536.14	0.44
STAM2	ENSG00000115145.9	0.44
LMBR1	ENSG00000105983.19	0.44
UBE2N	ENSG00000177889.9	0.44
RBBP5	ENSG00000117222.13	0.44
HLTF	ENSG00000071794.15	0.44
ATP13A3	ENSG00000133657.14	0.44
DNAJC10	ENSG00000077232.16	0.44
HNRNPK	ENSG00000165119.18	0.44
POLR1B	ENSG00000125630.15	0.44
CDS1	ENSG00000163624.5	0.44
DDX46	ENSG00000145833.15	0.44
KPNA3	ENSG00000102753.9	0.44
FBXO21	ENSG00000135108.14	0.43
UBFD1	ENSG00000103353.15	0.43
SMIM15	ENSG00000188725.7	0.43
HSPA8	ENSG00000109971.13	0.43
MTDH	ENSG00000147649.9	0.43
AZIN1	ENSG00000155096.13	0.43
KIAA1033	ENSG00000136051.13	0.43
USP47	ENSG00000170242.17	0.43
USP46	ENSG00000109189.12	0.43
TDP1	ENSG00000042088.13	0.43
RNF14	ENSG00000013561.17	0.43
SLK	ENSG00000065613.13	0.43
BCLAF1	ENSG00000029363.15	0.43
IARS2	ENSG00000067704.9	0.43
KPNA1	ENSG00000114030.12	0.43
ADNP2	ENSG00000101544.8	0.43
TMBIM6	ENSG00000139644.12	0.43
CLCN3	ENSG00000109572.13	0.43
LCLAT1	ENSG00000172954.13	0.43
XRCC5	ENSG00000079246.15	0.43
SLC25A40	ENSG00000075303.12	0.43
MIS18BP1	ENSG00000129534.13	0.43
BAG5	ENSG00000166170.9	0.43
RRN3	ENSG00000085721.12	0.43
SBNO1	ENSG00000139697.11	0.43
SENP1	ENSG00000079387.13	0.43
COPS4	ENSG00000138663.8	0.43
UBR3	ENSG00000144357.16	0.43
METTL2B	ENSG00000165055.15	0.43
BTBD7	ENSG00000011114.14	0.43
IPO11	ENSG00000086200.16	0.43
APAF1	ENSG00000120868.13	0.43
SCOC	ENSG00000153130.17	0.43
LMAN1	ENSG00000074695.5	0.43
RNF13	ENSG00000082996.19	0.43
DHFRP1	ENSG00000188985.6	0.43
GEMIN5	ENSG00000082516.8	0.43
PAK2	ENSG00000180370.10	0.43
PDCD6IP	ENSG00000170248.13	0.43
EPB41L5	ENSG00000115109.13	0.43
RP11-63A1.4	ENSG00000280158.1	0.43
TUG1	ENSG00000253352.8	0.43
BIRC6	ENSG00000115760.13	0.43
UBE4A	ENSG00000110344.9	0.43
MAP4K3	ENSG00000011566.14	0.43
MAPRE1	ENSG00000101367.8	0.43
BTBD10	ENSG00000148925.10	0.43
MFAP3	ENSG00000037749.11	0.43
TRAPPC11	ENSG00000168538.15	0.43
COL4A3BP	ENSG00000113163.15	0.43
DDX6	ENSG00000110367.11	0.43
GATC	ENSG00000257218.5	0.43
NSF	ENSG00000073969.18	0.43
PHTF2	ENSG00000006576.16	0.43
ZNF678	ENSG00000181450.17	0.43
NDUFS1	ENSG00000023228.13	0.43
SEC23IP	ENSG00000107651.12	0.43
TOX4	ENSG00000092203.13	0.43
EIF2S1	ENSG00000134001.12	0.43
KPNA4	ENSG00000186432.8	0.43
CSNK1G3	ENSG00000151292.17	0.43
SCARB2	ENSG00000138760.8	0.43
NIPA2	ENSG00000140157.14	0.43
SRSF10	ENSG00000188529.14	0.43
ERGIC1	ENSG00000113719.15	0.43
SRP54	ENSG00000100883.11	0.43
RLIM	ENSG00000131263.12	0.43
MIER3	ENSG00000155545.19	0.43
ACAP2	ENSG00000114331.12	0.43
ZNF562	ENSG00000171466.9	0.43
GRSF1	ENSG00000132463.13	0.43
ACBD3	ENSG00000182827.8	0.43
CELF1	ENSG00000149187.17	0.43
LATS1	ENSG00000131023.12	0.43
ATAD1	ENSG00000138138.13	0.43
LARP1	ENSG00000155506.16	0.43
RAB3GAP2	ENSG00000118873.15	0.43
ZNF41	ENSG00000147124.12	0.43
ARFGEF3	ENSG00000112379.8	0.43
NSD1	ENSG00000165671.18	0.43
LMBRD2	ENSG00000164187.6	0.43
EEA1	ENSG00000102189.16	0.43
PARG	ENSG00000227345.8	0.43
SPTLC1	ENSG00000090054.13	0.43
SRBD1	ENSG00000068784.12	0.43
YWHAB	ENSG00000166913.12	0.43
VPS41	ENSG00000006715.15	0.42
THAP6	ENSG00000174796.12	0.42
RP11-446E9.1	ENSG00000236814.1	0.42
SNX13	ENSG00000071189.21	0.42
MAPK14	ENSG00000112062.10	0.42
CSNK2A1	ENSG00000101266.16	0.42
ERCC8	ENSG00000049167.13	0.42
ZFAND3	ENSG00000156639.11	0.42
CDC27	ENSG00000004897.11	0.42
COG5	ENSG00000164597.13	0.42
RNF139	ENSG00000170881.4	0.42
ANKRD13C	ENSG00000118454.12	0.42
PDCD10	ENSG00000114209.14	0.42
ZNF845	ENSG00000213799.10	0.42
FUBP3	ENSG00000107164.15	0.42
CDK13	ENSG00000065883.14	0.42
KIF5B	ENSG00000170759.10	0.42
ARL1	ENSG00000120805.13	0.42
UBE2W	ENSG00000104343.19	0.42
ZSCAN29	ENSG00000140265.12	0.42
YIPF5	ENSG00000145817.16	0.42
RP11-553K23.2	ENSG00000214280.3	0.42
ANKIB1	ENSG00000001629.9	0.42
ZNF28	ENSG00000198538.10	0.42
CCDC125	ENSG00000183323.12	0.42
TARDBP	ENSG00000120948.15	0.42
TRAPPC13	ENSG00000113597.17	0.42
ANKRD32	ENSG00000133302.12	0.42
ORC5	ENSG00000164815.10	0.42
KCTD20	ENSG00000112078.13	0.42
ZNF207	ENSG00000010244.16	0.42
XRN2	ENSG00000088930.7	0.42
KANSL2	ENSG00000139620.12	0.42
PWP1	ENSG00000136045.11	0.42
PTBP3	ENSG00000119314.15	0.42
HEATR5B	ENSG00000008869.11	0.42
SUCLA2	ENSG00000136143.13	0.42
RNF4	ENSG00000063978.15	0.42
FAR1	ENSG00000197601.12	0.42
KLF3	ENSG00000109787.12	0.42
RACGAP1	ENSG00000161800.12	0.42
TROVE2	ENSG00000116747.12	0.42
WAPAL	ENSG00000062650.17	0.42
VKORC1L1	ENSG00000196715.5	0.42
DHFR	ENSG00000228716.6	0.42
MAP9	ENSG00000164114.18	0.42
PHC3	ENSG00000173889.15	0.42
ZNF410	ENSG00000119725.17	0.42
KLHL28	ENSG00000179454.13	0.42
PRDX3	ENSG00000165672.6	0.42
TMEM185B	ENSG00000226479.3	0.42
AP4E1	ENSG00000081014.10	0.42
DNAJB14	ENSG00000164031.16	0.42
AC000123.2	ENSG00000280347.1	0.42
SET	ENSG00000119335.16	0.42
UBE3C	ENSG00000009335.17	0.42
DPH6	ENSG00000134146.11	0.42
FANCM	ENSG00000187790.10	0.42
MAPK9	ENSG00000050748.17	0.42
VDAC1	ENSG00000213585.10	0.42
ZBTB1	ENSG00000126804.13	0.42
ALG10	ENSG00000139133.6	0.42
LRR1	ENSG00000165501.16	0.42
KIF21A	ENSG00000139116.17	0.42
C6orf62	ENSG00000112308.12	0.42
FAM151B	ENSG00000152380.9	0.42
FBXO45	ENSG00000174013.7	0.42
MAPK1	ENSG00000100030.14	0.42
CBLL1	ENSG00000105879.11	0.42
AP3M1	ENSG00000185009.12	0.42
CEP350	ENSG00000135837.15	0.42
KIAA0100	ENSG00000007202.14	0.42
RAB5A	ENSG00000144566.10	0.42
XPO4	ENSG00000132953.16	0.42
SEC23B	ENSG00000101310.14	0.42
FYTTD1	ENSG00000122068.12	0.42
TRUB1	ENSG00000165832.5	0.42
ERI2	ENSG00000196678.13	0.42
MRPL19	ENSG00000115364.13	0.42
ZNF800	ENSG00000048405.9	0.42
ATP6V1A	ENSG00000114573.9	0.42
ZYG11B	ENSG00000162378.12	0.42
ALG10B	ENSG00000175548.8	0.42
FAM179B	ENSG00000198718.12	0.42
CASP3	ENSG00000164305.17	0.42
COMMD10	ENSG00000145781.8	0.42
SRPK2	ENSG00000135250.16	0.42
uc_338	ENSG00000277217.1	0.42
RP11-21I4.4	ENSG00000278441.1	0.42
RP11-3G20.1	ENSG00000254209.1	0.42
RP2	ENSG00000102218.5	0.42
PIGM	ENSG00000143315.6	0.41
HSPA9	ENSG00000113013.12	0.41
ZNF268	ENSG00000090612.20	0.41
ERO1L	ENSG00000197930.12	0.41
ASB8	ENSG00000177981.10	0.41
PPP4R2	ENSG00000163605.14	0.41
RP11-445J9.1	ENSG00000238270.1	0.41
CPNE3	ENSG00000085719.11	0.41
CDC73	ENSG00000134371.9	0.41
EIF4EP2	ENSG00000229944.3	0.41
OR4A15	ENSG00000181958.3	0.41
RP11-447D11.3	ENSG00000280173.1	0.41
UHMK1	ENSG00000152332.15	0.41
YME1L1	ENSG00000136758.18	0.41
ZNF518A	ENSG00000177853.14	0.41
UBE2D2	ENSG00000131508.15	0.41
PMS2	ENSG00000122512.14	0.41
ATG12	ENSG00000145782.12	0.41
CKAP5	ENSG00000175216.14	0.41
LIN7C	ENSG00000148943.11	0.41
RAB10	ENSG00000084733.10	0.41
TRPM7	ENSG00000092439.13	0.41
DCUN1D1	ENSG00000043093.13	0.41
DLST	ENSG00000119689.14	0.41
SMIM14	ENSG00000163683.11	0.41
GFM2	ENSG00000164347.17	0.41
RC3H1	ENSG00000135870.11	0.41
WASL	ENSG00000106299.7	0.41
KIF2A	ENSG00000068796.16	0.41
SHTN1	ENSG00000187164.17	0.41
SPTLC2	ENSG00000100596.6	0.41
C10orf12	ENSG00000155640.6	0.41
MIB1	ENSG00000101752.11	0.41
FBXO33	ENSG00000165355.7	0.41
MOB1A	ENSG00000114978.17	0.41
TAB3	ENSG00000157625.15	0.41
AC005606.14	ENSG00000261790.1	0.41
TOR1AIP2	ENSG00000169905.12	0.41
SLC38A2	ENSG00000134294.13	0.41
TMEM106B	ENSG00000106460.18	0.41
HECTD1	ENSG00000092148.12	0.41
PDIK1L	ENSG00000175087.9	0.41
PSEN1	ENSG00000080815.18	0.41
RBM18	ENSG00000119446.13	0.41
PPP3R1	ENSG00000221823.10	0.41
ACTR6	ENSG00000075089.9	0.41
C6orf120	ENSG00000185127.6	0.41
CUL4B	ENSG00000158290.16	0.41
USP37	ENSG00000135913.10	0.41
GPR160	ENSG00000173890.16	0.41
RFC1	ENSG00000035928.14	0.41
NOP9	ENSG00000196943.12	0.41
YLPM1	ENSG00000119596.17	0.41
RAD50	ENSG00000113522.13	0.41
ZNF200	ENSG00000010539.11	0.41
LTN1	ENSG00000198862.13	0.41
PCNXL4	ENSG00000126773.12	0.41
PWWP2A	ENSG00000170234.12	0.41
RP11-651P23.4	ENSG00000224831.3	0.41
TMEM209	ENSG00000146842.16	0.41
ENTPD7	ENSG00000198018.6	0.41
CNOT4	ENSG00000080802.18	0.41
RP11-278L15.4	ENSG00000239408.1	0.41
RNF103	ENSG00000239305.6	0.41
SMEK2	ENSG00000275052.4	0.41
HMGCR	ENSG00000113161.15	0.41
WDR41	ENSG00000164253.12	0.41
METTL15	ENSG00000169519.19	0.41
OIP5-AS1	ENSG00000247556.6	0.41
METAP1	ENSG00000164024.11	0.41
C5orf22	ENSG00000082213.17	0.41
DCTN5	ENSG00000166847.9	0.41
XPOT	ENSG00000184575.11	0.41
UFL1	ENSG00000014123.9	0.41
SMG7	ENSG00000116698.20	0.41
NCBP1	ENSG00000136937.12	0.41
DLD	ENSG00000091140.12	0.41
MRS2	ENSG00000124532.14	0.41
SMARCA5	ENSG00000153147.5	0.41
CCNK	ENSG00000090061.17	0.41
PRIM1	ENSG00000198056.13	0.41
TRAPPC10	ENSG00000160218.12	0.41
MAP4K5	ENSG00000012983.11	0.41
MOB4	ENSG00000115540.14	0.41
BZW1	ENSG00000082153.17	0.41
MFSD8	ENSG00000164073.9	0.41
STRN	ENSG00000115808.11	0.41
ZFYVE16	ENSG00000039319.16	0.41
TUBGCP4	ENSG00000137822.12	0.41
DCLRE1A	ENSG00000198924.7	0.41
WDFY3	ENSG00000163625.15	0.41
HIAT1	ENSG00000156875.13	0.41
COX15	ENSG00000014919.12	0.41
ALG11	ENSG00000253710.2	0.41
FBXW11	ENSG00000072803.17	0.41
IPO8	ENSG00000133704.9	0.41
CAPZA1	ENSG00000116489.12	0.41
TAB2	ENSG00000055208.17	0.41
PSMC1P1	ENSG00000241506.1	0.41
MTPN	ENSG00000105887.10	0.41
SMC2	ENSG00000136824.18	0.41
LSG1	ENSG00000041802.10	0.41
PDZD8	ENSG00000165650.11	0.41
FBXO28	ENSG00000143756.11	0.41
DDX20	ENSG00000064703.11	0.41
TCF12	ENSG00000140262.17	0.41
NAPG	ENSG00000134265.12	0.41
ESCO2	ENSG00000171320.14	0.41
G3BP1	ENSG00000145907.14	0.41
ATG2B	ENSG00000066739.11	0.41
TMEM87A	ENSG00000103978.15	0.41
ZNF664	ENSG00000179195.15	0.41
ANKRD18EP	ENSG00000217165.1	0.41
RWDD4	ENSG00000182552.14	0.41
YTHDC2	ENSG00000047188.15	0.4
PRKAR2A	ENSG00000114302.15	0.4
PPID	ENSG00000171497.4	0.4
CASC4	ENSG00000166734.18	0.4
RP11-159G9.5	ENSG00000229729.6	0.4
ARPP19	ENSG00000128989.10	0.4
COG6	ENSG00000133103.16	0.4
CXorf23	ENSG00000173681.16	0.4
SLC38A1	ENSG00000111371.15	0.4
RN7SL464P	ENSG00000243872.3	0.4
WAC	ENSG00000095787.21	0.4
PIGN	ENSG00000197563.9	0.4
ATP2B1	ENSG00000070961.14	0.4
CEP97	ENSG00000182504.10	0.4
TRMT10A	ENSG00000145331.13	0.4
HNRNPF	ENSG00000169813.16	0.4
CAMSAP2	ENSG00000118200.14	0.4
STX17	ENSG00000136874.10	0.4
DDX3X	ENSG00000215301.9	0.4
GTF2H1	ENSG00000110768.11	0.4
FAM84B	ENSG00000168672.3	0.4
ZNF605	ENSG00000196458.10	0.4
BMPR1A	ENSG00000107779.11	0.4
EXD2	ENSG00000081177.18	0.4
RAPGEF6	ENSG00000158987.19	0.4
SLC2A10	ENSG00000197496.5	0.4
MAP3K2	ENSG00000169967.16	0.4
DNAJC14	ENSG00000135392.15	0.4
UBE2K	ENSG00000078140.13	0.4
SNAP23	ENSG00000092531.9	0.4
RP11-311H10.7	ENSG00000270542.1	0.4
CSNK2A3	ENSG00000254598.2	0.4
CTCF	ENSG00000102974.14	0.4
NFYB	ENSG00000120837.7	0.4
PLA2G12A	ENSG00000123739.10	0.4
ZNF2	ENSG00000275111.4	0.4
TGFBRAP1	ENSG00000135966.12	0.4
LIN52	ENSG00000205659.10	0.4
RMI1	ENSG00000178966.15	0.4
KIAA0232	ENSG00000170871.11	0.4
RANBP2	ENSG00000153201.15	0.4
C10orf88	ENSG00000119965.12	0.4
MED14	ENSG00000180182.10	0.4
RAB5B	ENSG00000111540.15	0.4
CUL5	ENSG00000166266.13	0.4
HACD3	ENSG00000074696.12	0.4
LCORL	ENSG00000178177.14	0.4
TYW5	ENSG00000162971.10	0.4
USP8	ENSG00000138592.13	0.4
TM9SF2	ENSG00000125304.8	0.4
ZNF12	ENSG00000164631.18	0.4
RDH11	ENSG00000072042.12	0.4
KRR1	ENSG00000111615.12	0.4
FASTKD5	ENSG00000215251.3	0.4
SLC25A36	ENSG00000114120.11	0.4
DPP8	ENSG00000074603.18	0.4
RP11-794C22.2	ENSG00000267518.1	0.4
INTS2	ENSG00000108506.11	0.4
CBX5	ENSG00000094916.13	0.4
FASTKD2	ENSG00000118246.13	0.4
DERL1	ENSG00000136986.9	0.4
UBE2D3	ENSG00000109332.19	0.4
ZNF253	ENSG00000256771.2	0.4
KIF20B	ENSG00000138182.14	0.4
FAM91A3P	ENSG00000242352.2	0.4
ZC3H14	ENSG00000100722.18	0.4
C9orf152	ENSG00000188959.9	0.4
RP11-241I20.1	ENSG00000230240.1	0.4
BDP1	ENSG00000145734.18	0.4
ZNF252P	ENSG00000196922.10	0.4
GPN3	ENSG00000111231.8	0.4
UBE3A	ENSG00000114062.17	0.4
CISD2	ENSG00000145354.9	0.4
EBLN3	ENSG00000281649.1	0.4
MMADHC	ENSG00000168288.12	0.4
FAM160B1	ENSG00000151553.14	0.4
RCOR1	ENSG00000089902.9	0.4
RAD17	ENSG00000152942.18	0.4
WDR26	ENSG00000162923.14	0.4
BCRP5	ENSG00000235062.4	0.4
STAG2	ENSG00000101972.18	0.4
ARL5A	ENSG00000162980.16	0.4
LARS	ENSG00000133706.17	0.4
SUPT16H	ENSG00000092201.9	0.4
PIK3CB	ENSG00000051382.8	0.4
RP11-466F5.4	ENSG00000225272.2	0.4
ANAPC1	ENSG00000153107.11	0.4
2022-03-06	ENSG00000145495.14	0.4
RP11-43P5.1	ENSG00000261782.1	0.4
ORC4	ENSG00000115947.13	0.4
UTP14C	ENSG00000253797.2	0.4
NECAP1	ENSG00000089818.16	0.4
RP11-618G20.1	ENSG00000258964.1	0.4
GPATCH2L	ENSG00000089916.17	0.4
UBE3B	ENSG00000151148.13	0.4
MAPK6	ENSG00000069956.11	0.4
NSUN3	ENSG00000178694.9	0.4
TMED8	ENSG00000100580.7	0.4
MBLAC2	ENSG00000176055.9	0.4
MRPS35	ENSG00000061794.12	0.4
YWHAG	ENSG00000170027.6	0.4
SLC35B3	ENSG00000124786.9	0.4
VAMP7	ENSG00000124333.14	0.4
NEMP1	ENSG00000166881.9	0.4
LNX2	ENSG00000139517.7	0.4
CACUL1	ENSG00000151893.14	0.4
MAGT1	ENSG00000102158.19	0.4
TMPO	ENSG00000120802.13	0.4
NUP43	ENSG00000120253.13	0.4
NIPA1	ENSG00000170113.15	0.4
ATF7IP	ENSG00000171681.12	0.4
KIF1BP	ENSG00000198954.6	0.4
PCYOX1	ENSG00000116005.11	0.4
ZNF721	ENSG00000182903.15	0.4
POLA1	ENSG00000101868.10	0.39
EXOC8	ENSG00000116903.7	0.39
GSTCD	ENSG00000138780.14	0.39
FLVCR1	ENSG00000162769.12	0.39
NUP50	ENSG00000093000.18	0.39
MTND5P7	ENSG00000230531.1	0.39
ZNF320	ENSG00000182986.12	0.39
UBN2	ENSG00000157741.14	0.39
DIS3	ENSG00000083520.14	0.39
IMPAD1	ENSG00000104331.8	0.39
SCFD2	ENSG00000184178.15	0.39
NAA50	ENSG00000121579.12	0.39
TSNAX	ENSG00000116918.13	0.39
RBM47	ENSG00000163694.14	0.39
ZNF106	ENSG00000103994.16	0.39
DCTN4	ENSG00000132912.12	0.39
ZNF669	ENSG00000188295.14	0.39
DBR1	ENSG00000138231.12	0.39
CANX	ENSG00000127022.14	0.39
DDX21	ENSG00000165732.12	0.39
WSB2	ENSG00000176871.8	0.39
UTP20	ENSG00000120800.4	0.39
EIF2AK1	ENSG00000086232.12	0.39
LSM12P1	ENSG00000232024.2	0.39
SERINC3	ENSG00000132824.13	0.39
PRMT3	ENSG00000185238.12	0.39
DLAT	ENSG00000150768.15	0.39
HIF1AN	ENSG00000166135.13	0.39
FNIP1	ENSG00000217128.11	0.39
KIAA1143	ENSG00000163807.5	0.39
VPS8	ENSG00000156931.15	0.39
TRIP12	ENSG00000153827.13	0.39
GCC2	ENSG00000135968.19	0.39
EP300	ENSG00000100393.9	0.39
LYPLA1	ENSG00000120992.17	0.39
STK35	ENSG00000125834.12	0.39
STAM	ENSG00000136738.14	0.39
ORC2	ENSG00000115942.8	0.39
NOC3L	ENSG00000173145.11	0.39
ZC3HAV1	ENSG00000105939.12	0.39
PPM1B	ENSG00000138032.20	0.39
GNA13	ENSG00000120063.9	0.39
GTF2I	ENSG00000263001.5	0.39
OR4A19P	ENSG00000254940.1	0.39
RCHY1	ENSG00000163743.13	0.39
MIOS	ENSG00000164654.15	0.39
RPP14	ENSG00000255154.7	0.39
LINC00657	ENSG00000260032.1	0.39
SPPL2A	ENSG00000138600.9	0.39
THRAP3	ENSG00000054118.13	0.39
PBRM1	ENSG00000163939.18	0.39
RP11-665E10.2	ENSG00000279793.1	0.39
DZIP3	ENSG00000198919.12	0.39
PTCD3	ENSG00000132300.18	0.39
METTL14	ENSG00000145388.14	0.39
RP11-344N17.11	ENSG00000237345.1	0.39
USP42	ENSG00000106346.11	0.39
ERCC4	ENSG00000175595.14	0.39
KIAA0196	ENSG00000164961.15	0.39
GRPEL2	ENSG00000164284.14	0.39
TLK1	ENSG00000198586.13	0.39
ZNF260	ENSG00000254004.6	0.39
NF1	ENSG00000196712.16	0.39
MTX3	ENSG00000177034.14	0.39
ZNF765	ENSG00000196417.12	0.39
PLEKHB2	ENSG00000115762.16	0.39
PI4K2B	ENSG00000038210.12	0.39
XRCC4	ENSG00000152422.15	0.39
SMG1	ENSG00000157106.16	0.39
BAZ1A	ENSG00000198604.10	0.39
DLG1	ENSG00000075711.20	0.39
C5orf15	ENSG00000113583.7	0.39
PDCL	ENSG00000136940.13	0.39
UBE2G1	ENSG00000132388.12	0.39
GOSR1	ENSG00000108587.14	0.39
MGA	ENSG00000174197.16	0.39
TRIM32	ENSG00000119401.10	0.39
SMARCC1	ENSG00000173473.10	0.39
PSME3	ENSG00000131467.10	0.39
HNRNPA1P7	ENSG00000215492.6	0.39
ZXDA	ENSG00000198205.6	0.39
DOPEY2	ENSG00000142197.12	0.39
OSBP	ENSG00000110048.11	0.39
WDR44	ENSG00000131725.13	0.39
ATRX	ENSG00000085224.20	0.39
TTC26	ENSG00000105948.13	0.39
CYB5R4	ENSG00000065615.13	0.39
DCAF17	ENSG00000115827.13	0.39
GORASP2	ENSG00000115806.12	0.39
RABL3	ENSG00000144840.8	0.39
SHPRH	ENSG00000146414.15	0.39
ACLY	ENSG00000131473.16	0.39
BROX	ENSG00000162819.11	0.39
MED6	ENSG00000133997.11	0.39
BLOC1S6	ENSG00000104164.10	0.39
COPZ1	ENSG00000111481.9	0.39
NARS	ENSG00000134440.11	0.39
ZFHX3	ENSG00000140836.14	0.39
OTUD4	ENSG00000164164.15	0.39
DYM	ENSG00000141627.13	0.39
EAF1	ENSG00000144597.13	0.39
MYO5C	ENSG00000128833.12	0.39
DNAJC13	ENSG00000138246.15	0.39
CRCP	ENSG00000241258.6	0.39
CRKL	ENSG00000099942.12	0.39
SNX4	ENSG00000114520.10	0.39
EXOC6	ENSG00000138190.16	0.39
TIMM17A	ENSG00000134375.10	0.39
MFN1	ENSG00000171109.18	0.39
FEM1B	ENSG00000169018.5	0.39
PDE12	ENSG00000174840.8	0.39
PEX1	ENSG00000127980.15	0.39
RNF111	ENSG00000157450.15	0.39
USP16	ENSG00000156256.14	0.39
NEDD4	ENSG00000069869.15	0.39
PHF6	ENSG00000156531.16	0.39
ASXL2	ENSG00000143970.16	0.39
EFCAB14	ENSG00000159658.10	0.39
VTA1	ENSG00000009844.15	0.39
KDM5B	ENSG00000117139.16	0.39
TFAM	ENSG00000108064.10	0.39
PRPF4B	ENSG00000112739.16	0.39
GOLGA4	ENSG00000144674.16	0.39
BTBD9	ENSG00000183826.16	0.39
MINPP1	ENSG00000107789.15	0.39
ZBTB41	ENSG00000177888.7	0.39
RP11-616L12.4	ENSG00000257350.1	0.39
ZMYM4	ENSG00000146463.11	0.39
ZWILCH	ENSG00000174442.11	0.39
ROCK1	ENSG00000067900.6	0.39
ARHGAP5	ENSG00000100852.12	0.39
UBXN2B	ENSG00000215114.7	0.39
TERF1	ENSG00000147601.13	0.39
ATL3	ENSG00000184743.12	0.39
ERLEC1	ENSG00000068912.13	0.39
AMMECR1L	ENSG00000144233.9	0.39
CNOT6L	ENSG00000138767.12	0.39
TCTN3	ENSG00000119977.20	0.39
ATF1	ENSG00000123268.8	0.39
LRCH3	ENSG00000186001.12	0.39
PJA2	ENSG00000198961.9	0.39
CSNK1G1	ENSG00000169118.15	0.39
YTHDC1	ENSG00000083896.12	0.39
NUPL1	ENSG00000139496.15	0.39
FAM98B	ENSG00000171262.11	0.39
ZNF708	ENSG00000182141.9	0.39
P4HA2-AS1	ENSG00000237714.1	0.39
SPAST	ENSG00000021574.11	0.38
GNL3L	ENSG00000130119.15	0.38
COPS2	ENSG00000166200.14	0.38
NAA35	ENSG00000135040.15	0.38
C4orf46	ENSG00000205208.4	0.38
FCHO2	ENSG00000157107.13	0.38
FBXO34	ENSG00000178974.9	0.38
ANKHD1	ENSG00000131503.20	0.38
XPNPEP3	ENSG00000196236.12	0.38
BRWD3	ENSG00000165288.10	0.38
ERICH3-AS1	ENSG00000234497.5	0.38
CTD-2006C1.6	ENSG00000267500.1	0.38
SMC1A	ENSG00000072501.17	0.38
NDFIP2	ENSG00000102471.13	0.38
SAMD12	ENSG00000177570.13	0.38
ZNF281	ENSG00000162702.7	0.38
GLE1	ENSG00000119392.14	0.38
CTD-2014B16.2	ENSG00000258960.1	0.38
HAUS3	ENSG00000214367.7	0.38
RTF1	ENSG00000137815.14	0.38
PRRC2C	ENSG00000117523.15	0.38
RAB33B	ENSG00000172007.5	0.38
TRIM23	ENSG00000113595.14	0.38
ARL8B	ENSG00000134108.12	0.38
SELT	ENSG00000198843.12	0.38
ZNF143	ENSG00000166478.9	0.38
RP11-12N13.4	ENSG00000242456.1	0.38
RNF20	ENSG00000155827.11	0.38
SLX4IP	ENSG00000149346.14	0.38
MNAT1	ENSG00000020426.10	0.38
RAB11FIP2	ENSG00000107560.10	0.38
ZKSCAN5	ENSG00000196652.11	0.38
FAM175B	ENSG00000165660.7	0.38
RBM41	ENSG00000089682.16	0.38
FAM120A	ENSG00000048828.16	0.38
PHF8	ENSG00000172943.18	0.38
PAICS	ENSG00000128050.8	0.38
NUFIP2	ENSG00000108256.8	0.38
LINC00350	ENSG00000225316.1	0.38
SCAF8	ENSG00000213079.9	0.38
POLR2M	ENSG00000255529.7	0.38
MRPL44	ENSG00000135900.3	0.38
SETD3	ENSG00000183576.12	0.38
SETD5	ENSG00000168137.15	0.38
KBTBD7	ENSG00000120696.8	0.38
N4BP2	ENSG00000078177.13	0.38
OR6C4	ENSG00000179626.3	0.38
GOLGA1	ENSG00000136935.13	0.38
SUZ12	ENSG00000178691.10	0.38
TMEM241	ENSG00000134490.13	0.38
BAZ2A	ENSG00000076108.11	0.38
GNAQ	ENSG00000156052.10	0.38
AAGAB	ENSG00000103591.12	0.38
IPMK	ENSG00000151151.5	0.38
CANT1	ENSG00000171302.16	0.38
DCK	ENSG00000156136.9	0.38
NHLRC2	ENSG00000196865.4	0.38
GIGYF2	ENSG00000204120.14	0.38
GABPA	ENSG00000154727.10	0.38
LEO1	ENSG00000166477.12	0.38
RP11-473N11.2	ENSG00000256238.1	0.38
CTR9	ENSG00000198730.7	0.38
RP11-487I5.4	ENSG00000232437.1	0.38
RP11-359P18.6	ENSG00000253195.2	0.38
ATP8B1	ENSG00000081923.10	0.38
ZNF701	ENSG00000167562.11	0.38
NUP155	ENSG00000113569.15	0.38
ZNF609	ENSG00000180357.9	0.38
PCYT1A	ENSG00000161217.11	0.38
TOR1B	ENSG00000136816.15	0.38
CNTF	ENSG00000242689.2	0.38
PLAGL2	ENSG00000126003.6	0.38
ZNF623	ENSG00000183309.11	0.38
BTBD1	ENSG00000064726.9	0.38
ATP6V0A2	ENSG00000185344.13	0.38
SUCO	ENSG00000094975.13	0.38
VBP1	ENSG00000155959.10	0.38
PARPBP	ENSG00000185480.11	0.38
DHX29	ENSG00000067248.9	0.38
HOOK1	ENSG00000134709.10	0.38
ISG20L2	ENSG00000143319.16	0.38
HAUS1P3	ENSG00000253226.1	0.38
SOGA1	ENSG00000149639.14	0.38
GAB1	ENSG00000109458.8	0.38
SGPL1	ENSG00000166224.16	0.38
C12orf66	ENSG00000174206.12	0.38
LINC00630	ENSG00000223546.6	0.38
DDI2	ENSG00000197312.11	0.38
ATP7A	ENSG00000165240.17	0.38
ZDHHC20	ENSG00000180776.15	0.38
ZNF398	ENSG00000197024.8	0.38
TDP2	ENSG00000111802.13	0.38
CUL2	ENSG00000108094.14	0.38
TAF2	ENSG00000064313.11	0.38
TMEM127	ENSG00000135956.8	0.38
PGM3	ENSG00000013375.15	0.38
TM9SF4	ENSG00000101337.15	0.38
RPE	ENSG00000197713.14	0.38
PPP6R3	ENSG00000110075.14	0.38
EXOC1	ENSG00000090989.17	0.38
RP11-325E14.2	ENSG00000228051.1	0.38
RP11-411B10.4	ENSG00000267756.1	0.38
DNAJC24	ENSG00000170946.14	0.38
RHBDD1	ENSG00000144468.16	0.38
TRIM24	ENSG00000122779.16	0.38
TFCP2	ENSG00000135457.9	0.38
RGMB	ENSG00000174136.11	0.38
UBXN7	ENSG00000163960.11	0.38
FEM1C	ENSG00000145780.7	0.38
RRM1	ENSG00000167325.14	0.38
MCM8	ENSG00000125885.13	0.38
DAZAP2	ENSG00000183283.15	0.38
RFX7	ENSG00000181827.14	0.38
TIMM9	ENSG00000100575.13	0.38
SLC31A1	ENSG00000136868.10	0.38
STARD3NL	ENSG00000010270.13	0.38
PPP3CB	ENSG00000107758.15	0.38
RMND5A	ENSG00000153561.12	0.38
MON2	ENSG00000061987.14	0.38
TPD52	ENSG00000076554.15	0.38
GPBP1	ENSG00000062194.15	0.38
SPOPL	ENSG00000144228.8	0.38
PPHLN1	ENSG00000134283.17	0.38
RP11-60E8.2	ENSG00000271018.1	0.38
ARID4A	ENSG00000032219.18	0.38
SECISBP2L	ENSG00000138593.8	0.38
RFK	ENSG00000135002.11	0.38
RP11-463O12.3	ENSG00000256152.2	0.38
MOSPD1	ENSG00000101928.12	0.38
NOLC1	ENSG00000166197.16	0.38
AP1G1	ENSG00000166747.12	0.38
ZMYM1	ENSG00000197056.9	0.38
THUMPD1	ENSG00000066654.12	0.38
RABGAP1	ENSG00000011454.16	0.38
GSK3B	ENSG00000082701.14	0.38
ARL6IP1	ENSG00000170540.14	0.38
TAOK1	ENSG00000160551.9	0.38
REEP3	ENSG00000165476.12	0.38
SPRTN	ENSG00000010072.15	0.38
CAB39	ENSG00000135932.10	0.38
NEK1	ENSG00000137601.15	0.38
FAM13B	ENSG00000031003.10	0.38
VTI1A	ENSG00000151532.13	0.38
RP4-769N13.6	ENSG00000271147.7	0.37
DHRS4-AS1	ENSG00000215256.3	0.37
FANCF	ENSG00000183161.4	0.37
DBF4	ENSG00000006634.7	0.37
